# Supplementary material
Source: PubMed Central journal article supplement (PMC3137063)
Supplement: supp_M111.255828_jbc.M111.255828-1.pdf [file supp_M111.255828_jbc.M111.255828-1.pdf]

## SUPPLEMENTAL EXPERIMENTAL PROCEDURES, FIGURES AND TABLES FOR ALBERSHARDT ET AL

### Reagents and Antibodies

BH3 mimetics were obtained as follows: ABT-737 from Abbott Laboratories (Abbott Park, IL); GX15-070 from Gemin X Pharmaceuticals (Malvern, PA); apogossypol from NCI/CTEP (Bethesda, MD); gossypol, HA14-1, and 2-methoxy-antimycin A<sub>3</sub> from Enzo Life Sciences Inc. (Farmingdale, NY); S1 was synthesized according to a previously published method (1). Bortezomib was purchased from LC Laboratories (Woburn, MA), Hoechst 33342 from Molecular Probes (Eugene, OR), zVAD-fmk from Enzyme Systems Products, Inc. (Livermore, CA), and digitonin from Sigma (St. Louis, MO).

Antibodies were obtained as follows: mouse anti-BAD (C-7), goat anti-PUMA (N-19), rabbit anti-BAX (N-20), rabbit anti-ATF4 (H-290), rabbit anti-ATF3 (C-19) and rabbit anti-c-Myc (N-262) from Santa Cruz Biotechnology Inc. (Santa Cruz, CA); mouse anti-NOXA and rabbit anti-BIM from Calbiochem (San Diego, CA); goat anti-BID from R&D Systems (Minneapolis, MN); rabbit anti-BAK from Millipore (Billerica, MA); mouse anti-BCL2 from Dako (Carpinteria, CA); mouse anti-BCL-X<sub>L</sub> from Zymed Laboratories (San Francisco, CA); mouse anti-MCL1 from BD Pharmingen (San Diego, CA); rabbit anti-phospho-eIF2 $\alpha$  (D9G8) and rabbit anti-PARP from Cell Signaling Technology (Beverly, MA); and mouse anti-tubulin from Sigma. Secondary antibodies were purchased from BioRad (Hercules, CA).

### Primers and Thermal Cycling Conditions for Quantitative Reverse Transcription PCR Analysis

Primer sequences were as follows:

MCL1 (F: 5'-TCAAAAACGAAGACGATGTGA-3', R: 5'-CAAAGGCACCAAAGAAATGA-3'),

NOXA (F: 5'-AAGAAGGCGCGCAAGAAC-3', R: 5'-TCCTGAGCAGAAGAGTT TGG-3'),

ATF3 (F: 5'-CTCCTGGGTCACCTGGTGTTT-3', R: 5'-GTCGCCTCTTTTTCCTTTCA-3'),

GAPDH (F: 5'-CTCAGACACCATGGGGAAGGTGA-3',

R: 5'-ATGATCTTGAGGCTGTTGTCATA-3').

Thermal cycling was carried out by DNA Engine Opticon<sup>TM</sup> (BioRad), using the following conditions. MCL1 and NOXA: 40 cycles at 94°C for 30 sec, 50°C for 30 sec, 72°C for 15 sec; ATF3: 40 cycles at 94°C for 30 sec, 55°C for 30 sec, 72°C for 1 min; and GAPDH: 30 cycles at 94°C for 30 sec, 56.7°C for 30 sec, 72°C for 1 min.

1. Zhang, Z., Jin, L., Qian, X., Wei, M., Wang, Y., Wang, J., Yang, Y., Xu, Q., Xu, Y., and Liu, F. (2007) *Chembiochem* **8**, 113-121

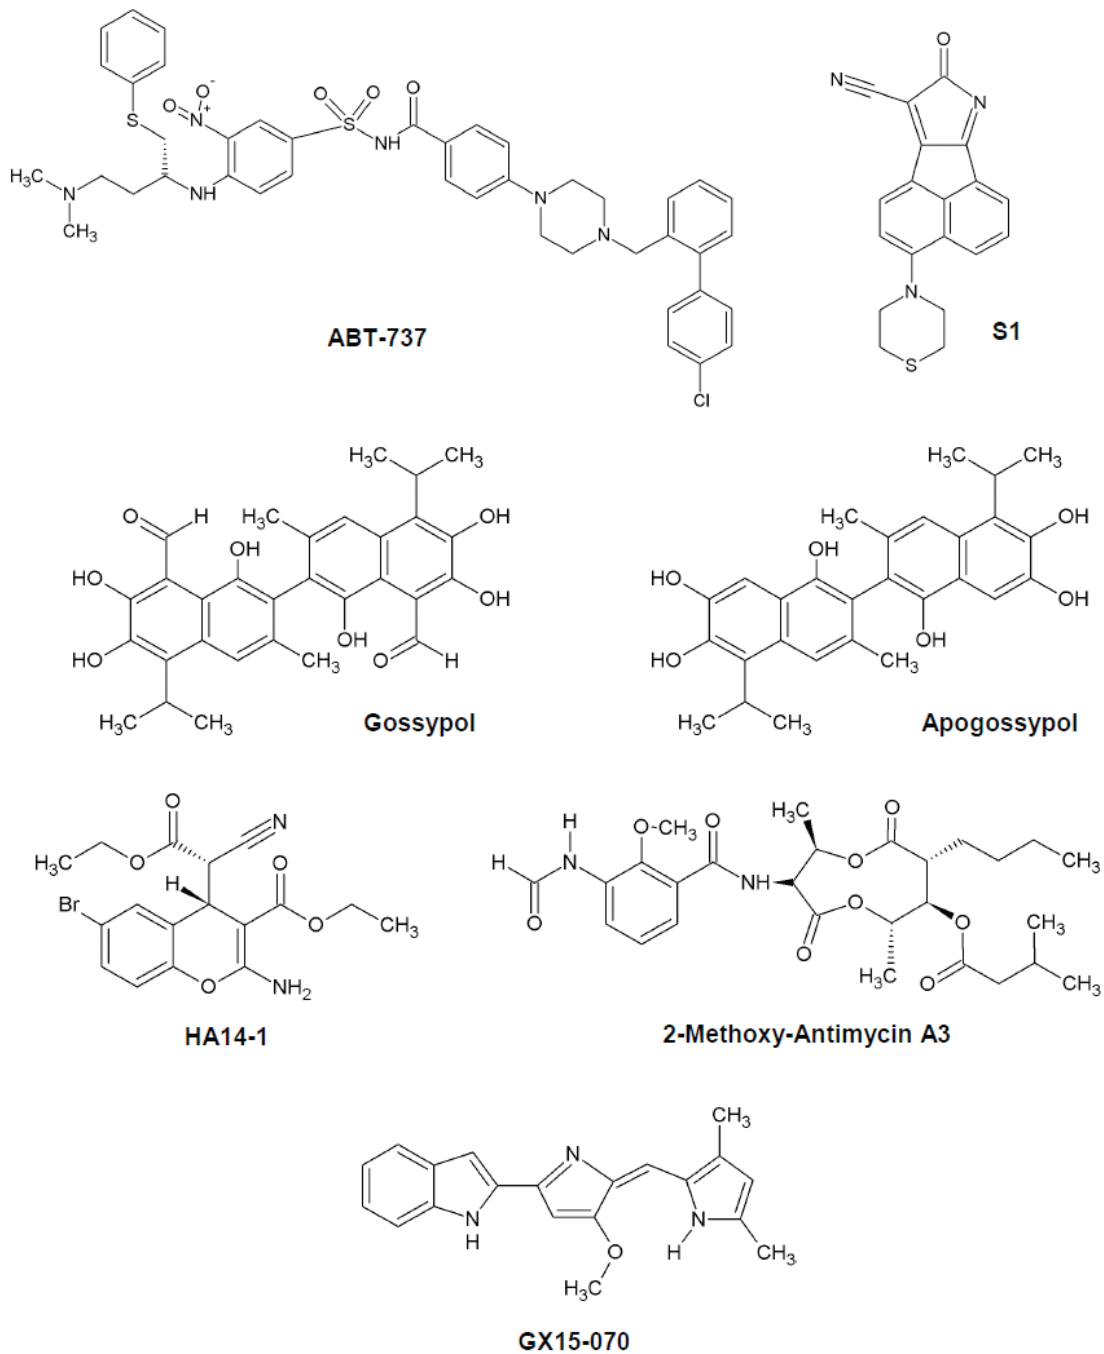

FIGURE S1. Chemical Structures of Putative BH3 Mimetics.

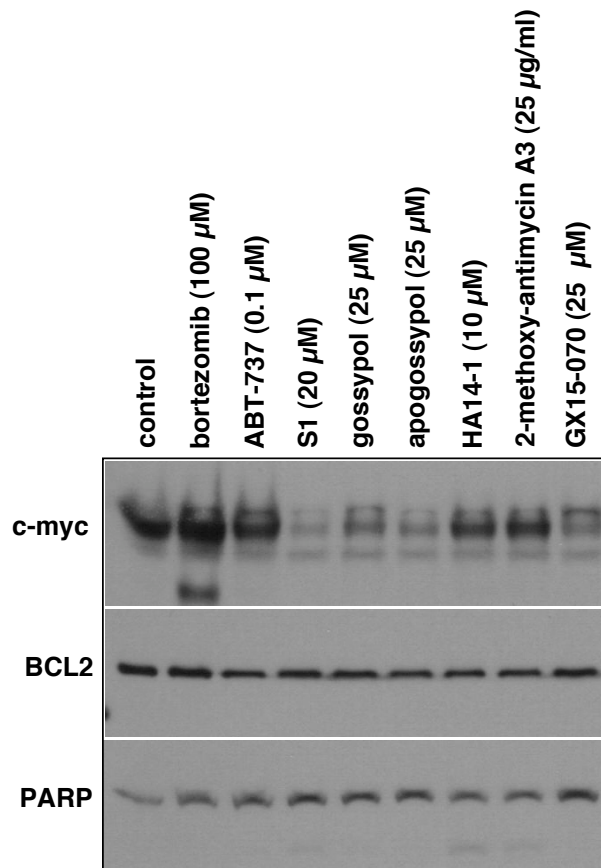

FIGURE S2. **Impact of BH3 Mimetics on c-Myc Expression.** NB4 cells were incubated with the indicated compounds for 6 h, then analyzed for expression of c-Myc, BCL2 and PARP (the latter two as loading controls). While bortezomib slightly induces c-myc expression, ABT-737 has little impact. Most of the other “BH3 mimetics” reduce expression consistent with activation of eIF2 $\alpha$  and inhibition of translation.

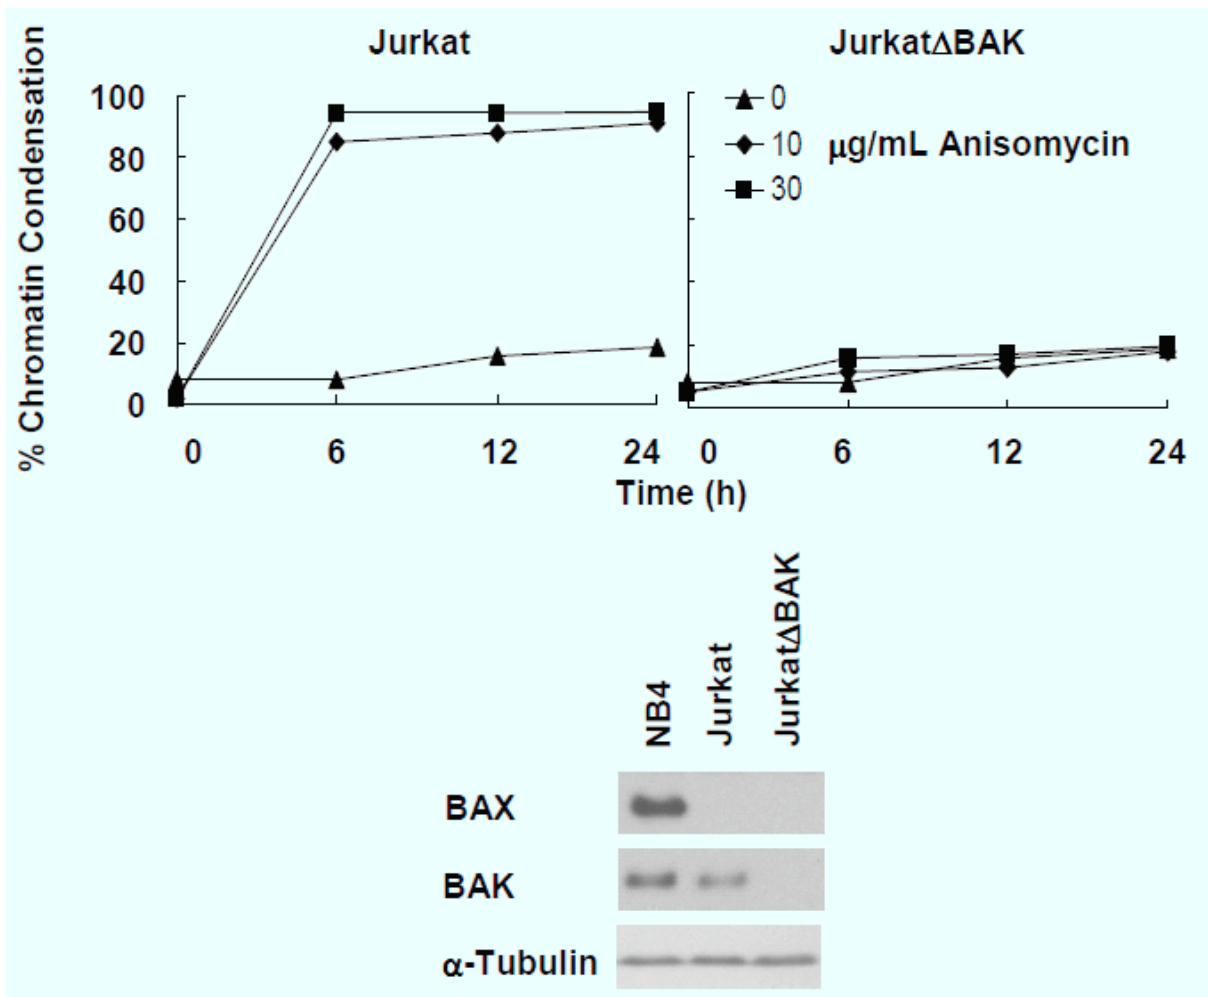

**FIGURE S3. Characterization of Wild-Type Jurkat and JurkatΔBAK Cells.** Wild-type Jurkat and JurkatΔBAK cells were incubated with anisomycin for 0-24 h, stained with Hoechst 33342, and scored for chromatin condensation. Untreated cells were lysed and probed for BAX and BAK, using NB4 cell lysate as a positive control.

Table S1. **Genes Induced by Gossypol and S1.** NB4 cells were incubated with 20  $\mu$ M gossypol or 20  $\mu$ M S1 for 6 h and analyzed for gene expression. Numbers reflect average of two independent experiments. Stress-induced genes discussed in the text are highlighted. PMAIP1=NOXA; some genes are represented several times. A, Genes induced more than 2-fold by both gossypol and S1. B, Genes induced more than 2-fold by gossypol but not S1. C, Genes induced more than 2-fold by S1 but not gossypol.

**A. Genes Induced More Than 2-Fold by Both Gossypol and S1**

| Gene Symbol | Control average | Gossypol average | S1 average | Gossypol fold induction | S1 fold induction |
|-------------|-----------------|------------------|------------|-------------------------|-------------------|
| KLF2        | 221             | 2231             | 562        | 10.1                    | 2.5               |
| ATF3        | 279             | 1762             | 1499       | 6.3                     | 5.4               |
| DDIT4       | 2367            | 14854            | 11309      | 6.3                     | 4.8               |
| IL8         | 2008            | 12563            | 47976      | 6.3                     | 23.9              |
| STC2        | 300             | 1750             | 1124       | 5.8                     | 3.7               |
| DDIT3       | 562             | 2932             | 9435       | 5.2                     | 16.8              |
| EGR1        | 381             | 1737             | 1070       | 4.6                     | 2.8               |
| IL8         | 6370            | 24730            | 55002      | 3.9                     | 8.6               |
| CEBPB       | 2491            | 9530             | 13459      | 3.8                     | 5.4               |
| KLF6        | 435             | 1636             | 978        | 3.8                     | 2.3               |
| TRIB3       | 5022            | 18862            | 20503      | 3.8                     | 4.1               |
| PPP1R15A    | 1739            | 6305             | 11213      | 3.6                     | 6.4               |
| CCL3        | 158             | 558              | 571        | 3.5                     | 3.6               |
| KLF6        | 710             | 2427             | 1460       | 3.4                     | 2.1               |
| CCL3L3      | 244             | 828              | 813        | 3.4                     | 3.3               |
| PMAIP1      | 669             | 2242             | 2528       | 3.4                     | 3.8               |
| ARL4        | 405             | 1296             | 1022       | 3.2                     | 2.5               |
| NFKBIZ      | 346             | 1103             | 4387       | 3.2                     | 12.7              |
| VEGFA       | 392             | 1199             | 917        | 3.1                     | 2.3               |
| GADD45A     | 720             | 2193             | 3395       | 3.0                     | 4.7               |
| ADM2        | 256             | 710              | 989        | 2.8                     | 3.9               |
| KCNG1       | 784             | 2166             | 5099       | 2.8                     | 6.5               |
| GADD45A     | 1661            | 4361             | 6184       | 2.6                     | 3.7               |
| NFIL3       | 519             | 1305             | 1518       | 2.5                     | 2.9               |
| CTH         | 175             | 395              | 1195       | 2.3                     | 6.8               |
| PSAT1       | 3261            | 7244             | 9430       | 2.2                     | 2.9               |
| PRDM13      | 145             | 320              | 342        | 2.2                     | 2.4               |
| PHLDA1      | 516             | 1103             | 5487       | 2.1                     | 10.6              |
| PCK2        | 658             | 1401             | 2963       | 2.1                     | 4.5               |
| MAFB        | 411             | 872              | 2616       | 2.1                     | 6.4               |
| NUDT18      | 200             | 418              | 526        | 2.1                     | 2.6               |
| RELB        | 159             | 332              | 485        | 2.1                     | 3.0               |
| PMAIP1      | 225             | 448              | 536        | 2.0                     | 2.4               |
| CCL3L3      | 180             | 359              | 386        | 2.0                     | 2.1               |
| ABCA1       | 827             | 1643             | 2794       | 2.0                     | 3.4               |
| C6ORF48     | 196             | 383              | 526        | 2.0                     | 2.7               |

**B. Genes induced more than 2-fold by gossypol but not S1**

| Gene Symbol | Control average | Gossypol average | S1 average | Gossypol fold induction | S1 fold induction |
|-------------|-----------------|------------------|------------|-------------------------|-------------------|
| TNFAIP3     | 290             | 1303             | 512        | 4.5                     | 1.8               |
| TSC22D3     | 324             | 1295             | 465        | 4.0                     | 1.4               |
| JUN         | 1065            | 4126             | 1412       | 3.9                     | 1.3               |
| TSC22D3     | 494             | 1642             | 627        | 3.3                     | 1.3               |
| PTGER4      | 885             | 2458             | 866        | 2.8                     | 1.0               |
| HNRPDL      | 3325            | 7505             | 4793       | 2.3                     | 1.4               |
| TFAP2C      | 185             | 416              | 241        | 2.3                     | 1.3               |
| SC4MOL      | 2549            | 5699             | 1454       | 2.2                     | 0.6               |
| LOC643031   | 6098            | 13134            | 10799      | 2.2                     | 1.8               |
| TIPARP      | 1433            | 2995             | 2460       | 2.1                     | 1.7               |
| HMGCS1      | 5846            | 11858            | 2923       | 2.0                     | 0.5               |
| TNFAIP3     | 290             | 1303             | 512        | 4.5                     | 1.8               |

**C. Genes induced more than 2-fold by S1 but not gossypol**

| Gene Symbol | Control average | Gossypol average | S1 average | Gossypol fold induction | S1 fold induction |
|-------------|-----------------|------------------|------------|-------------------------|-------------------|
| OSGIN1      | 197             | 257              | 4125       | 1.3                     | 21.0              |
| RGC32       | 764             | 1065             | 7160       | 1.4                     | 9.4               |
| IER3        | 244             | 463              | 2148       | 1.9                     | 8.8               |
| LOC338758   | 341             | 647              | 2690       | 1.9                     | 7.9               |
| HYPE        | 337             | 254              | 2589       | 0.8                     | 7.7               |
| HERPUD1     | 1689            | 1888             | 12710      | 1.1                     | 7.5               |
| HERPUD1     | 1282            | 1355             | 9210       | 1.1                     | 7.2               |
| GCLM        | 1177            | 919              | 8267       | 0.8                     | 7.0               |
| SRXN1       | 1006            | 583              | 7012       | 0.6                     | 7.0               |
| C1ORF24     | 1027            | 1540             | 6804       | 1.5                     | 6.6               |
| GCLM        | 213             | 176              | 1397       | 0.8                     | 6.5               |
| TNFRSF10B   | 528             | 807              | 3223       | 1.5                     | 6.1               |
| DUSP6       | 432             | 437              | 2582       | 1.0                     | 6.0               |
| DNAJB9      | 946             | 655              | 5416       | 0.7                     | 5.7               |
| TSPYL2      | 323             | 277              | 1778       | 0.9                     | 5.5               |
| MAP1LC3B    | 1509            | 2373             | 8304       | 1.6                     | 5.5               |
| NAB2        | 273             | 233              | 1457       | 0.9                     | 5.3               |
| STX5A       | 647             | 497              | 3385       | 0.8                     | 5.2               |
| KIAA0746    | 170             | 191              | 878        | 1.1                     | 5.2               |
| C1ORF24     | 1868            | 2559             | 9530       | 1.4                     | 5.1               |
| PBEF1       | 681             | 750              | 3335       | 1.1                     | 4.9               |
| ME1         | 572             | 749              | 2755       | 1.3                     | 4.8               |
| PBEF1       | 422             | 470              | 2008       | 1.1                     | 4.8               |
| TSPYL2      | 291             | 231              | 1343       | 0.8                     | 4.6               |
| CCPG1       | 953             | 1684             | 4377       | 1.8                     | 4.6               |
| CDKN1A      | 708             | 1059             | 3205       | 1.5                     | 4.5               |
| SMOX        | 199             | 332              | 897        | 1.7                     | 4.5               |
| SERPINB8    | 478             | 547              | 2084       | 1.1                     | 4.4               |
| TXNRD1      | 2261            | 1491             | 9782       | 0.7                     | 4.3               |
| TGIF1       | 966             | 1796             | 4010       | 1.9                     | 4.1               |
| HYOU1       | 910             | 693              | 3770       | 0.8                     | 4.1               |
| FTHL12      | 5375            | 4716             | 22173      | 0.9                     | 4.1               |

|           |      |       |       |     |     |
|-----------|------|-------|-------|-----|-----|
| FTHL11    | 711  | 631   | 2921  | 0.9 | 4.1 |
| SERPINB8  | 476  | 552   | 1936  | 1.2 | 4.1 |
| ITPR1     | 342  | 335   | 1382  | 1.0 | 4.0 |
| TXNRD1    | 4225 | 2908  | 17005 | 0.7 | 4.0 |
| CDK5RAP2  | 312  | 304   | 1240  | 1.0 | 4.0 |
| CBX4      | 645  | 896   | 2556  | 1.4 | 4.0 |
| OSCAR     | 425  | 505   | 1659  | 1.2 | 3.9 |
| CDK2AP2   | 374  | 265   | 1460  | 0.7 | 3.9 |
| BTG1      | 3936 | 7203  | 15286 | 1.8 | 3.9 |
| SLC3A2    | 2056 | 3857  | 7975  | 1.9 | 3.9 |
| NRP1      | 409  | 398   | 1561  | 1.0 | 3.8 |
| CYP2R1    | 679  | 881   | 2578  | 1.3 | 3.8 |
| ARRDC4    | 207  | 281   | 783   | 1.4 | 3.8 |
| KRCC1     | 451  | 714   | 1635  | 1.6 | 3.6 |
| CARS      | 836  | 1583  | 3031  | 1.9 | 3.6 |
| TGIF1     | 1542 | 2802  | 5549  | 1.8 | 3.6 |
| JAG1      | 801  | 1419  | 2882  | 1.8 | 3.6 |
| ATP2B1    | 250  | 315   | 884   | 1.3 | 3.5 |
| STX5A     | 204  | 175   | 699   | 0.9 | 3.4 |
| FTHL12    | 3348 | 3350  | 11386 | 1.0 | 3.4 |
| ITPKA     | 775  | 975   | 2593  | 1.3 | 3.3 |
| PTPDC1    | 193  | 241   | 644   | 1.2 | 3.3 |
| GOT1      | 4819 | 7238  | 16071 | 1.5 | 3.3 |
| VLDLR     | 971  | 1787  | 3182  | 1.8 | 3.3 |
| ANXA1     | 1746 | 2126  | 5717  | 1.2 | 3.3 |
| GFPT1     | 569  | 559   | 1862  | 1.0 | 3.3 |
| PPAPDC1B  | 292  | 314   | 952   | 1.1 | 3.3 |
| PGD       | 4692 | 4651  | 15185 | 1.0 | 3.2 |
| TXNIP     | 1948 | 3123  | 6294  | 1.6 | 3.2 |
| ASNS      | 7689 | 14650 | 24728 | 1.9 | 3.2 |
| RFFL      | 354  | 398   | 1125  | 1.1 | 3.2 |
| DUSP5     | 322  | 372   | 1019  | 1.2 | 3.2 |
| LOC647650 | 201  | 313   | 633   | 1.6 | 3.2 |
| FBXL13    | 284  | 303   | 891   | 1.1 | 3.1 |
| LMO4      | 530  | 823   | 1660  | 1.6 | 3.1 |
| NFE2L1    | 846  | 1032  | 2600  | 1.2 | 3.1 |
| ADFP      | 1469 | 1953  | 4507  | 1.3 | 3.1 |
| TUFT1     | 180  | 276   | 550   | 1.5 | 3.0 |
| BASP1     | 7715 | 8334  | 23460 | 1.1 | 3.0 |
| UCHL1     | 510  | 396   | 1545  | 0.8 | 3.0 |
| FKBP14    | 372  | 393   | 1128  | 1.1 | 3.0 |
| MXD1      | 621  | 910   | 1869  | 1.5 | 3.0 |
| ADFP      | 390  | 550   | 1163  | 1.4 | 3.0 |
| CSNK2A2   | 1275 | 1472  | 3799  | 1.2 | 3.0 |
| TMEM22    | 281  | 261   | 831   | 0.9 | 3.0 |
| SLC3A2    | 3981 | 6727  | 11736 | 1.7 | 2.9 |
| SLC3A2    | 918  | 1355  | 2705  | 1.5 | 2.9 |
| EMP1      | 201  | 346   | 588   | 1.7 | 2.9 |
| CLEC5A    | 209  | 194   | 596   | 0.9 | 2.8 |
| LOC646463 | 268  | 331   | 764   | 1.2 | 2.8 |
| NRP1      | 165  | 222   | 465   | 1.4 | 2.8 |
| SERTAD1   | 252  | 388   | 711   | 1.5 | 2.8 |
| EIF1      | 6765 | 10132 | 19109 | 1.5 | 2.8 |

|           |       |       |       |     |     |
|-----------|-------|-------|-------|-----|-----|
| SYVN1     | 1467  | 833   | 4135  | 0.6 | 2.8 |
| KRCC1     | 268   | 367   | 748   | 1.4 | 2.8 |
| YPEL5     | 338   | 354   | 944   | 1.0 | 2.8 |
| ASNS      | 998   | 1563  | 2755  | 1.6 | 2.8 |
| DUSP6     | 1182  | 1101  | 3252  | 0.9 | 2.8 |
| ISGF3G    | 332   | 321   | 913   | 1.0 | 2.7 |
| RNF185    | 158   | 165   | 431   | 1.0 | 2.7 |
| ADAM17    | 271   | 306   | 739   | 1.1 | 2.7 |
| ASF1A     | 1206  | 890   | 3269  | 0.7 | 2.7 |
| CCPG1     | 156   | 223   | 421   | 1.4 | 2.7 |
| DFNA5     | 176   | 171   | 475   | 1.0 | 2.7 |
| CHGB      | 355   | 296   | 936   | 0.8 | 2.6 |
| P2RX4     | 747   | 1074  | 1960  | 1.4 | 2.6 |
| CYLD      | 199   | 223   | 520   | 1.1 | 2.6 |
| RIT1      | 185   | 173   | 485   | 0.9 | 2.6 |
| CNIH3     | 253   | 273   | 659   | 1.1 | 2.6 |
| UBE2H     | 262   | 363   | 683   | 1.4 | 2.6 |
| SLC6A9    | 146   | 200   | 380   | 1.4 | 2.6 |
| TRIM5     | 386   | 293   | 994   | 0.8 | 2.6 |
| DNAJC3    | 182   | 157   | 469   | 0.9 | 2.6 |
| EPB41L5   | 324   | 316   | 831   | 1.0 | 2.6 |
| FTHL7     | 22055 | 20321 | 56563 | 0.9 | 2.6 |
| PRNP      | 1696  | 1401  | 4283  | 0.8 | 2.5 |
| TSPYL2    | 221   | 190   | 557   | 0.9 | 2.5 |
| C10ORF32  | 610   | 724   | 1527  | 1.2 | 2.5 |
| FAM100B   | 175   | 148   | 438   | 0.8 | 2.5 |
| HS.143018 | 168   | 223   | 416   | 1.3 | 2.5 |
| GAB2      | 738   | 876   | 1831  | 1.2 | 2.5 |
| SDF2L1    | 8161  | 3202  | 20238 | 0.4 | 2.5 |
| HS.355933 | 632   | 963   | 1567  | 1.5 | 2.5 |
| GARS      | 10632 | 13589 | 26295 | 1.3 | 2.5 |
| ARMET     | 8892  | 5241  | 21979 | 0.6 | 2.5 |
| MLPH      | 149   | 180   | 368   | 1.2 | 2.5 |
| TMEM154   | 338   | 585   | 832   | 1.7 | 2.5 |
| ADORA2B   | 595   | 533   | 1433  | 0.9 | 2.4 |
| TIGA1     | 5829  | 9558  | 14021 | 1.6 | 2.4 |
| LOC653344 | 226   | 266   | 534   | 1.2 | 2.4 |
| RN7SK     | 196   | 259   | 463   | 1.3 | 2.4 |
| IL1B      | 165   | 187   | 389   | 1.1 | 2.4 |
| CMTM8     | 183   | 193   | 430   | 1.1 | 2.4 |
| WARS      | 1943  | 1990  | 4561  | 1.0 | 2.3 |
| PGM3      | 393   | 332   | 921   | 0.8 | 2.3 |
| AXUD1     | 580   | 932   | 1343  | 1.6 | 2.3 |
| ELL2      | 171   | 192   | 394   | 1.1 | 2.3 |
| FAM130A1  | 255   | 430   | 589   | 1.7 | 2.3 |
| STK19     | 667   | 942   | 1537  | 1.4 | 2.3 |
| KIAA0286  | 915   | 771   | 2087  | 0.8 | 2.3 |
| FAM107B   | 1342  | 1547  | 3040  | 1.2 | 2.3 |
| NRIP3     | 2602  | 2426  | 5888  | 0.9 | 2.3 |
| SLC22A15  | 771   | 989   | 1735  | 1.3 | 2.3 |
| SSR2      | 326   | 316   | 728   | 1.0 | 2.2 |
| TLE4      | 514   | 490   | 1145  | 1.0 | 2.2 |
| NEIL3     | 1172  | 971   | 2608  | 0.8 | 2.2 |



|           |       |       |       |     |     |
|-----------|-------|-------|-------|-----|-----|
| ZMYM5     | 304   | 445   | 674   | 1.5 | 2.2 |
| PPP1R3F   | 274   | 272   | 608   | 1.0 | 2.2 |
| PGM3      | 273   | 243   | 595   | 0.9 | 2.2 |
| ERRFI1    | 646   | 1063  | 1401  | 1.6 | 2.2 |
| HBEGF     | 814   | 1168  | 1764  | 1.4 | 2.2 |
| UBE2H     | 265   | 293   | 572   | 1.1 | 2.2 |
| STK40     | 2487  | 2191  | 5355  | 0.9 | 2.2 |
| MAX       | 244   | 463   | 524   | 1.9 | 2.1 |
| STK19     | 1083  | 1351  | 2320  | 1.2 | 2.1 |
| MCTP1     | 357   | 386   | 765   | 1.1 | 2.1 |
| SDCBP     | 823   | 854   | 1761  | 1.0 | 2.1 |
| PNPLA8    | 245   | 248   | 517   | 1.0 | 2.1 |
| C16ORF52  | 318   | 350   | 670   | 1.1 | 2.1 |
| FTL       | 21183 | 19086 | 44701 | 0.9 | 2.1 |
| DGKQ      | 736   | 888   | 1551  | 1.2 | 2.1 |
| SNX5      | 1646  | 2333  | 3457  | 1.4 | 2.1 |
| H1F0      | 668   | 883   | 1403  | 1.3 | 2.1 |
| GPR84     | 1620  | 1664  | 3393  | 1.0 | 2.1 |
| HBP1      | 212   | 219   | 442   | 1.0 | 2.1 |
| HLA-E     | 886   | 875   | 1845  | 1.0 | 2.1 |
| PRMT1     | 364   | 578   | 757   | 1.6 | 2.1 |
| FLT4      | 212   | 268   | 440   | 1.3 | 2.1 |
| PSCD2     | 1786  | 1909  | 3707  | 1.1 | 2.1 |
| MTHFD2    | 10917 | 15091 | 22554 | 1.4 | 2.1 |
| FTL       | 24753 | 21908 | 50821 | 0.9 | 2.1 |
| LIMS1     | 393   | 392   | 803   | 1.0 | 2.0 |
| SDC4      | 322   | 379   | 650   | 1.2 | 2.0 |
| LOC196752 | 226   | 207   | 455   | 0.9 | 2.0 |
| ARF4      | 850   | 596   | 1698  | 0.7 | 2.0 |
| SLC25A36  | 588   | 505   | 1174  | 0.9 | 2.0 |
